# Supplementary material for: Mg1.5Lu1.5Al3.5Si1.5O12:Ce3+,Mn2+: A novel garnet phosphor with adjustable emission color for blue light-emitting diodes
Source: Royal Society of Chemistry journal article supplement (doi:10.1039/c2ra00894g), 2012-01-01
Supplement: c2ra00894g.pdf [file c2ra00894g.pdf]

## **Supporting information**

### **Mg<sub>1.5</sub>Lu<sub>1.5</sub>Al<sub>3.5</sub>Si<sub>1.5</sub>O<sub>12</sub>:Ce<sup>3+</sup>, Mn<sup>2+</sup>: A Novel Garnet Phosphor with Adjustable Emission Color for Blue Light-Emitting Diodes**

Yongchao Jia,<sup>a,b</sup> Yeju Huang,<sup>c</sup> Ning Guo,<sup>a,b</sup> Hui Qiao,<sup>a,b</sup> Yuhua Zheng,<sup>a,b</sup> Wenzhen Lv,<sup>a,b</sup> Qi Zhao<sup>a,b</sup>

and Hongpeng You<sup>a\*</sup>

<sup>a</sup>State key Laboratory of Rare Earth Resource Utilization, Changchun Institute of Applied  
Chemistry, Chinese Academy of Sciences, Changchun 130022, P. R. China.

<sup>b</sup>Graduate University of the Chinese Academy of Sciences, Beijing 100049, P. R. China.

<sup>c</sup>School of National Defence Science and Technology, Southwest University of Science and  
Technology, Mianyang 621010, P. R. China

\*Corresponding author: E-mail address: [hpyou@ciac.jl.cn](mailto:hpyou@ciac.jl.cn)

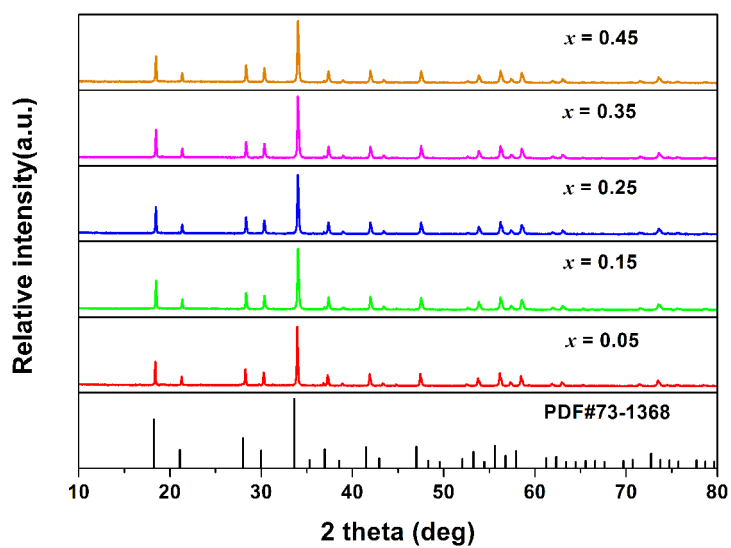

Figure S1. XRD profiles for MLASO:0.05Ce<sup>3+</sup>,<sub>x</sub>Mn<sup>2+</sup> phosphors on Mn<sup>2+</sup> doping content ( $x=0.05$ , 0.15, 0.25, 0.35 and 0.45). The standard data for Lu<sub>3</sub>Al<sub>5</sub>O<sub>12</sub> (JCPDS card No. 73-1368) is shown as reference.

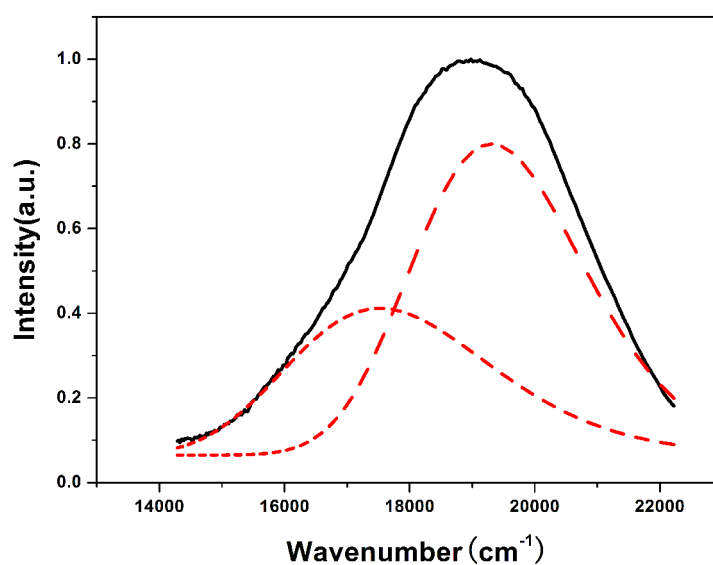

Figure S2. Emission spectrum of MLASO:Ce<sup>3+</sup> and two Gaussian component on an energy scale.

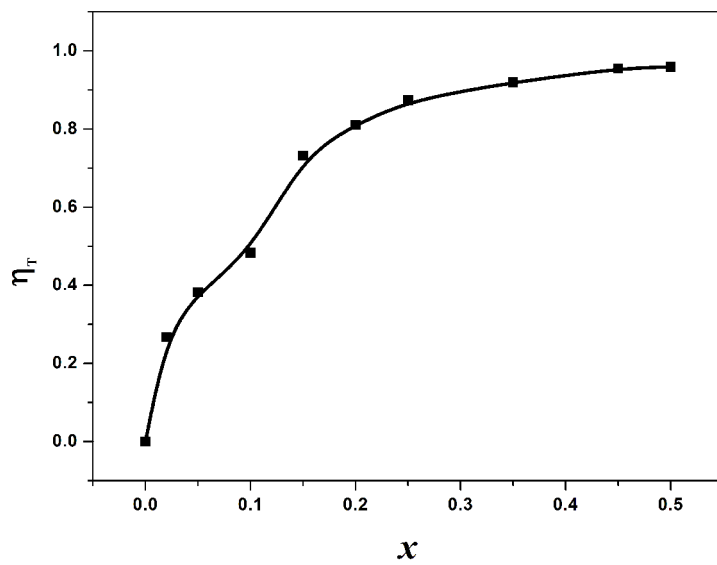

Figure S3. Dependence of the energy transfer efficiency  $\eta_T$  on  $Mn^{2+}$  content  $x$ .
